# Supplementary material for: Efficient solar-to-thermal management on femtosecond laser composite fabrication of hierarchical Janus plates
Source: Royal Society of Chemistry journal article supplement (doi:10.1039/d5nr02434j), 2025-01-01
Supplement: d5nr02434j1.pdf [file d5nr02434j1.pdf]

## **Efficient solar-to-thermal management on femtosecond laser composite fabrication of hierarchical Janus plates**

Shiqing Tang <sup>a</sup>, Kai Yin<sup>\*a, b, c</sup>, Jianqiang Xiao <sup>a</sup>, Haonan Yu <sup>a</sup>, Xinghao Song <sup>a</sup>, Xin  
Deng <sup>a</sup>, Yin Huang <sup>a</sup>, Hua Wang <sup>a</sup>

*<sup>a</sup>Hunan Key Laboratory of Nanophotonic and Devices, School of Physics,  
Central South University, Changsha, 410083, China.*

*<sup>b</sup>State Key Laboratory of Precision Manufacturing for Extreme Service  
Performance, College of Mechanical and Electrical Engineering, Central  
South University, Changsha 410083, China.*

*<sup>c</sup>State Key Laboratory of Intelligent Manufacturing Equipment and  
Technology, Huazhong University of Science and Technology, Wuhan,  
430000, China*

This file contains Supplementary Experimental Section, Figures S1-S8.

\*To whom correspondence should be addressed.

\*Corresponding author: kaiyin@csu.edu.cn

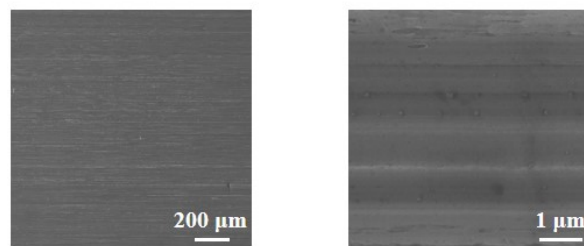

**Fig. S1** SEM images of pristine stainless steel surfaces at different magnifications.

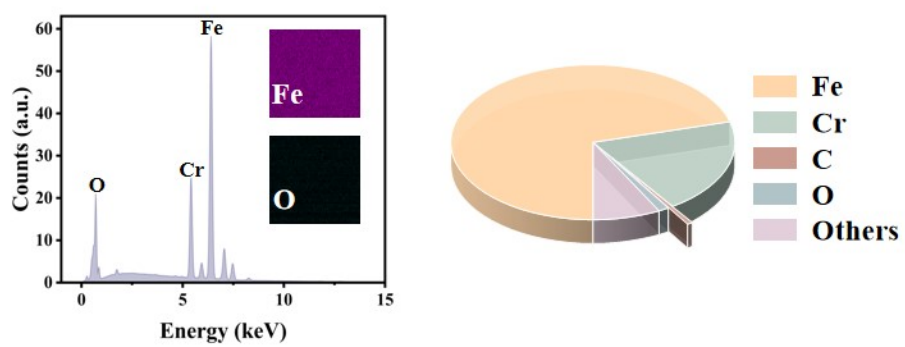

**Fig. S2** EDS images of pristine stainless steel.

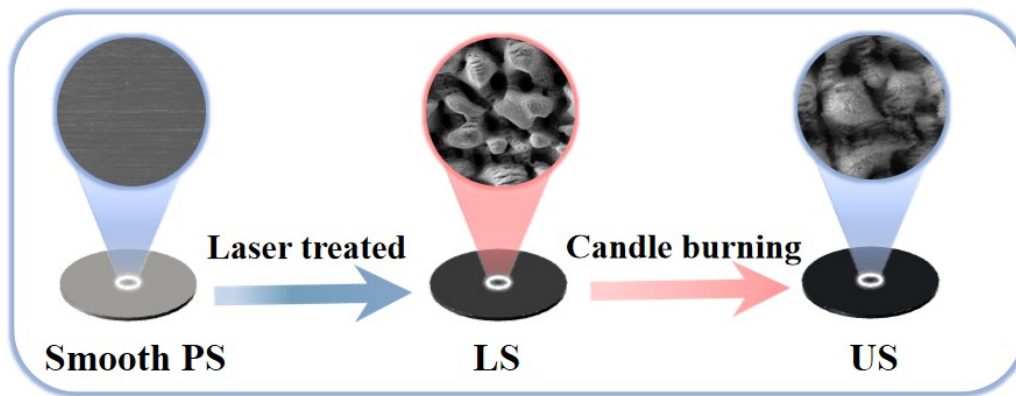

**Fig. S3** The change in the microstructure of UL during the preparation process.

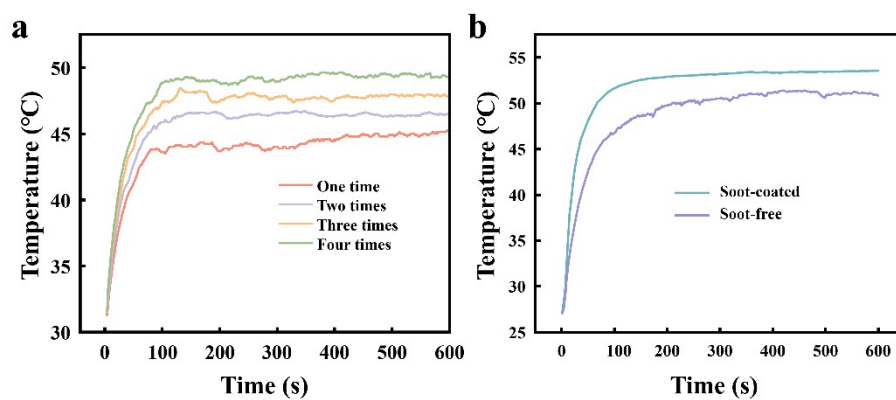

**Fig. S4** Effects of laser passes and soot coating on photothermal performance.

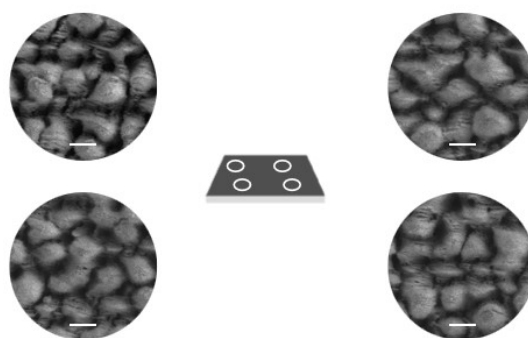

**Fig. S5** SEM images of upper surface at four different locations. Scale bars equal to 10  $\mu\text{m}$  in the normal areas.

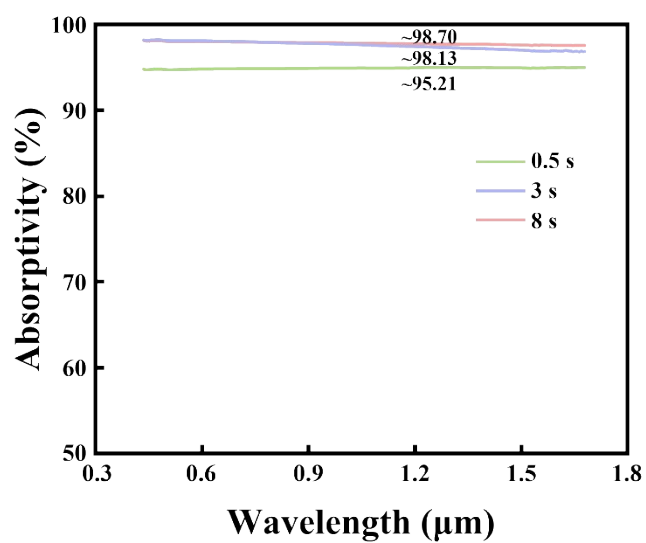

**Fig. S6** The effect of soot concentration on surface absorptivity.

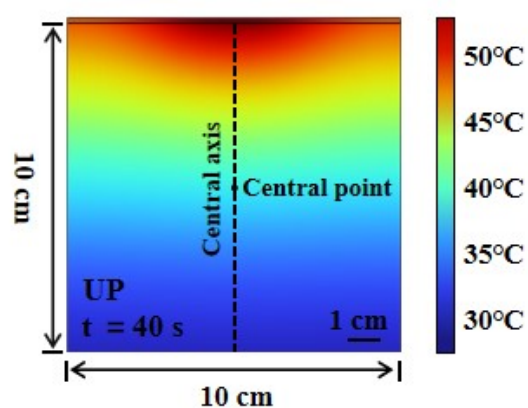

**Fig. S7** Temperature cross-section of the UP box simulated by COMSOL simulation under 1.5 sun.

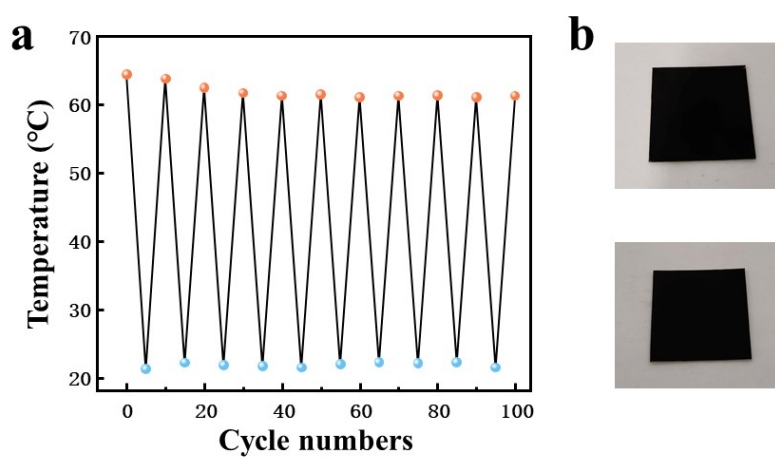

**Fig. S8** (a) The photothermal performance of US surface under 1.5 sun illumination during being rubbed 100 times with a brush. (b) Optical images of US before and after being rubbed 100 times.
